# Supplementary material
Source: PubMed Central journal article supplement (PMC6815188)
Supplement: pnas.1909284116.sapp.pdf [file pnas.1909284116.sapp.pdf]

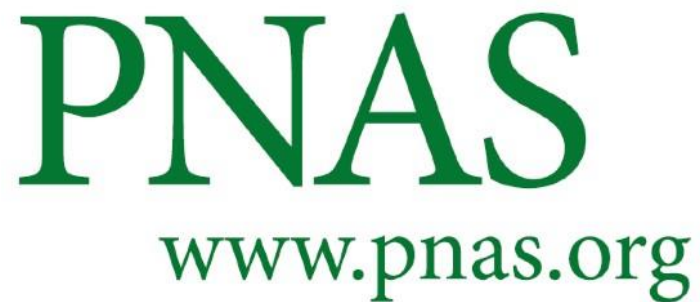

Supplementary Information for

Early hominins evolved within non-analog ecosystems

J. Tyler Faith, John Rowan, Andrew Du

J. Tyler Faith  
E-mail: [jfaith@nhmu.utah.edu](mailto:jfaith@nhmu.utah.edu)

**This PDF file includes:**

Supplementary text  
Figures S1 to S3  
Tables S1 to S3  
References for SI reference citations

**Other supplementary materials for this manuscript include the following:**

Datasets S1 to S2

## Supplementary Information Text

### Detailed Materials and Methods

**Materials.** Our study examines modern and fossil herbivore communities, including species belonging to the orders Artiodactyla, Perissodactyla, and Proboscidea (i.e., ungulates). The database of 204 modern African herbivore communities (Dataset S1) comes from species lists for protected areas (e.g., national parks, game reserves) compiled by Kamilar et al. (1) and Rowan et al. (2). Their geographic locations are illustrated in Figure 1 (see also Table S1). Body mass data for each extant species were derived from Kingdon et al. (3), and taxa were assigned to one of five size classes that approximate a widely used scheme (4) for African mammals: Size 1 = < 18 kg; Size 2 = 18 to 80 kg; Size 3 = 80 to 350 kg; Size 4 = 350 to 1,000 kg; Size 5 = > 1,000 kg. Size 5 taxa are considered megaherbivores following Owen-Smith (5). Taxa were assigned to one of three dietary categories (browser, grazer, mixed feeder) based on Kingdon et al. (3) and other expert references (e.g., 6, 7).

The database of 101 fossil herbivore communities and the functional trait attributes of fossil species (Dataset S2; Table S2) is from Faith et al. (8). Fossil taxa were assigned to a size class based on published body mass estimates or descriptions provided in their taxonomic diagnoses (e.g., a fossil bovid described as similar in size to modern impala would be assigned to the same size class as impala: Size 2). In the absence of such information, size classes were assigned based on extant or fossil relatives or from our own personal experience and/or outside expert opinions. Dietary classifications were based primarily on published stable carbon isotopes ( $\delta^{13}\text{C}$ ) of tooth enamel:  $\delta^{13}\text{C}$  enamel values of  $> -1\text{‰}$  =  $\text{C}_4$  grazers;  $-1$  to  $-8\text{‰}$  =  $\text{C}_3$ - $\text{C}_4$  mixed feeders;  $< -8\text{‰}$  =  $\text{C}_3$  browsers (following 9). For taxa lacking  $\delta^{13}\text{C}$  data, dietary assignments were based on the diets of fossil or modern relatives, or other lines of paleodietary evidence (e.g., microwear, mesowear) when available. The primary sources of all body mass and dietary assignments are provided in Faith et al. (8).

Several of the large herbivore taxa in our fossil database are known to have shifted their diets through time (9, 10). Based on published  $\delta^{13}\text{C}$  data, we use the following dietary classifications:

*Notochoerus* spp.: mixed feeder >3.0 Ma; grazer <3.0 Ma.

*Loxodonta* spp.: mixed feeder >3 Ma; grazer from 3 to 1.4 Ma; browser for records assigned to extant *Loxodonta africana*, all younger than 0.4 Ma. Our database has no records of *Loxodonta* from 1.4 to 0.4 Ma.

*Elephas* spp.: mixed feeder >3.4 Ma; grazer <3.4 Ma.

*Sivatherium* spp.: browser >2.5 Ma; mixed feeder 2.5 to 1.5 Ma; grazer <1.5 Ma.

**Methods.** We exclude all Size 1 taxa (< 18 kg) from analyses of modern and fossil communities to control for potential taphonomic biases against recovery of smaller

herbivore taxa in the fossil record (11). Fidelity studies exploring the relationship between living vertebrate communities and their associated bone assemblages provide confidence that the size range considered here (Size 2 to 5) should not be substantially biased by size-mediated taphonomic processes (12).

We use a methodological approach established by Faith et al. (8) to control for potential biases in the fossil record, including time-averaging and sampling effort. This is critical for our study because greater time-averaging or sampling effort will increase the number of taxa recovered in a given fossil assemblage (13, 14). Assuming that the effects of time-averaging and sampling effort are independent of herbivore functional traits, it is possible to control for them by examining the richness of a given functional type (e.g., the number of grazers, ruminants, or Size 3 taxa) relative to overall community richness (i.e., the total number of species). In the fossil communities, richness is based on tallies of non-overlapping taxa (e.g., records of *Equus quagga* and *Equus* sp. represent a single species because the latter cannot be shown to represent a second species).

For the sample of modern communities, we generated ordinary least-squares linear regressions to model the richness of a given functional type as a function of overall community richness in the modern sample (Figure S1). We then calculated the residuals for the fossil assemblages by calculating the deviation between the observed richness of a given functional type and the expected richness based on the modern regression. Temporal trends in the fossil residuals are illustrated using locally estimated scatterplot smoothing (LOESS), with a smoothing factor of 0.75. This approach controls for the effects of differential sampling effort between assemblages, and has been shown ameliorate the effects of differential time-averaging between assemblages (8).

Though calculation of residuals for the more taxonomically rich fossil assemblages involves extrapolating beyond maximum richness observed in the modern dataset, we note that these residuals are strongly correlated with those obtained using an ordinary least-squares regression modelling the relationship between richness of a given functional trait and community richness across the fossil samples (S5:  $r = 0.907$ ,  $p < 0.001$ ; S4:  $r = 0.993$ ,  $p < 0.001$ ; S3:  $r = 0.982$ ,  $p < 0.001$ ; S2:  $r = 0.712$ ,  $p < 0.001$ ; non-ruminant:  $r = 0.860$ ,  $p < 0.001$ ; grazer:  $r = 1.000$ ,  $p < 0.001$ ; mixed feeder:  $r = 0.996$ ,  $p < 0.001$ ; browser:  $r = 0.984$ ,  $p < 0.001$ ), meaning that the results are little changed. This also means that our use of modern faunas as a baseline has not obscured the broad temporal changes in functional trait composition. Figure S2 shows that the temporal trends based on the fossil regressions are comparable to those illustrated in Figure 2 of the main text.

### **Large Carnivoran Richness**

To demonstrate trends in large carnivoran (>100 kg) richness (Figure 4F), we tallied the presence of carnivoran taxa in eastern Africa across 0.5 Myr time bins (Table S3). Our use of these bins is due to the rarity of large carnivorans in eastern African fossil assemblages, which precludes an analysis comparable to that provided for the herbivores. The >100 kg body mass threshold encompasses species capable of preying

on megaherbivores (15), with fossil taxa assigned to the >100 kg size class on the basis of published mass estimates, morphological descriptions, or the size of fossil congeners (see Table S3). We did not include the massive otter *Enhydriodon dikikae*, given that its diet (and ability to procure megaherbivore prey) is unclear (16).

To ameliorate any influence of differential sampling effort across time bins, we generated an ordinary least-squares regression to model the relationship between the number of sites and the number of species (Figure S3). We then calculated residuals as the deviation between observed richness and expected richness based on the regression (shown in Figure 4F). We excluded the most recent time bin (the last 0.5 Myr) from analysis because the large carnivore guild is effectively modern at this time (17, 18), and because the large number of sites in this bin, many of which are Holocene (Table S2), would substantially skew the regression.

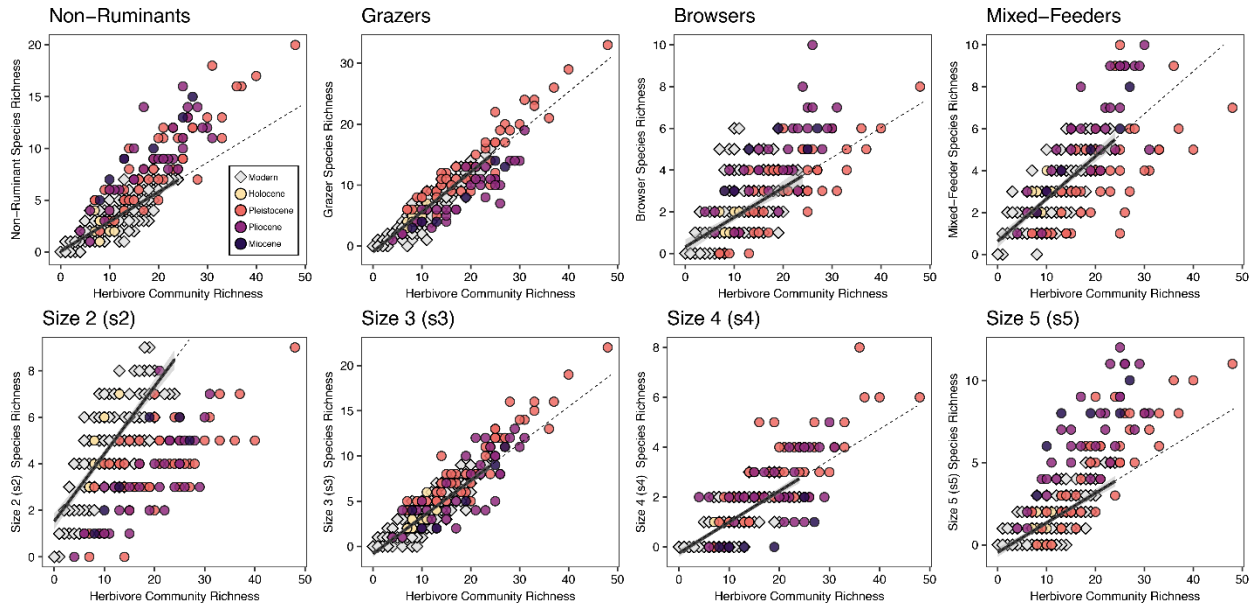

Fig. S1. The relationships between total herbivore community richness and the richness of a given functional trait in modern and fossil communities. Solid line indicates the ordinary least-squares regression for the modern data; dashed line is an extrapolation.

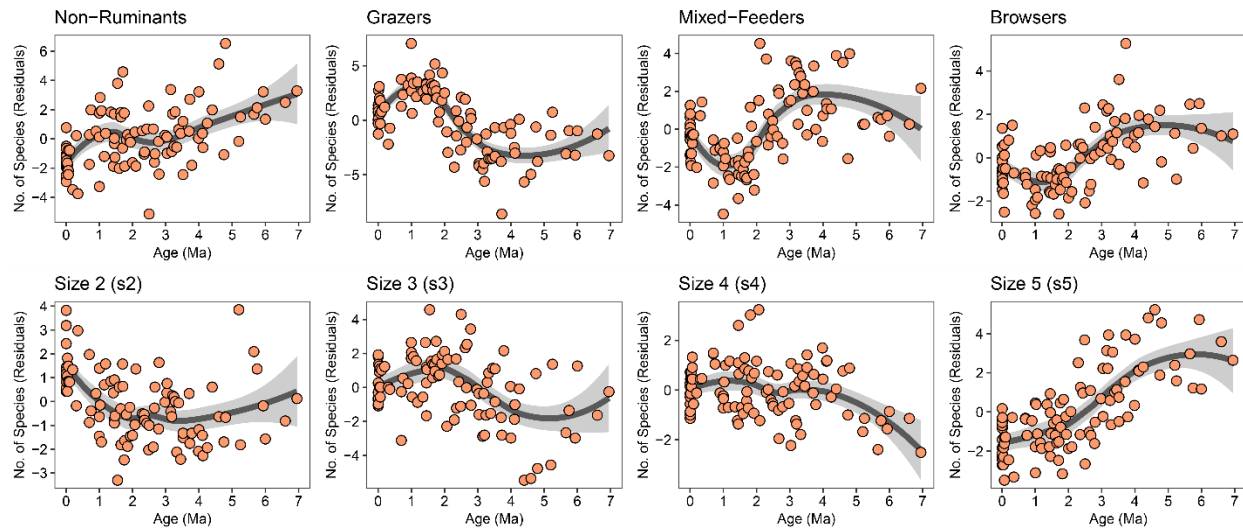

Fig. S2. Temporal trends in the functional trait composition of eastern African large herbivore communities over the last 7 Myr based on residuals derived from ordinary least-squares regressions for the fossil data.

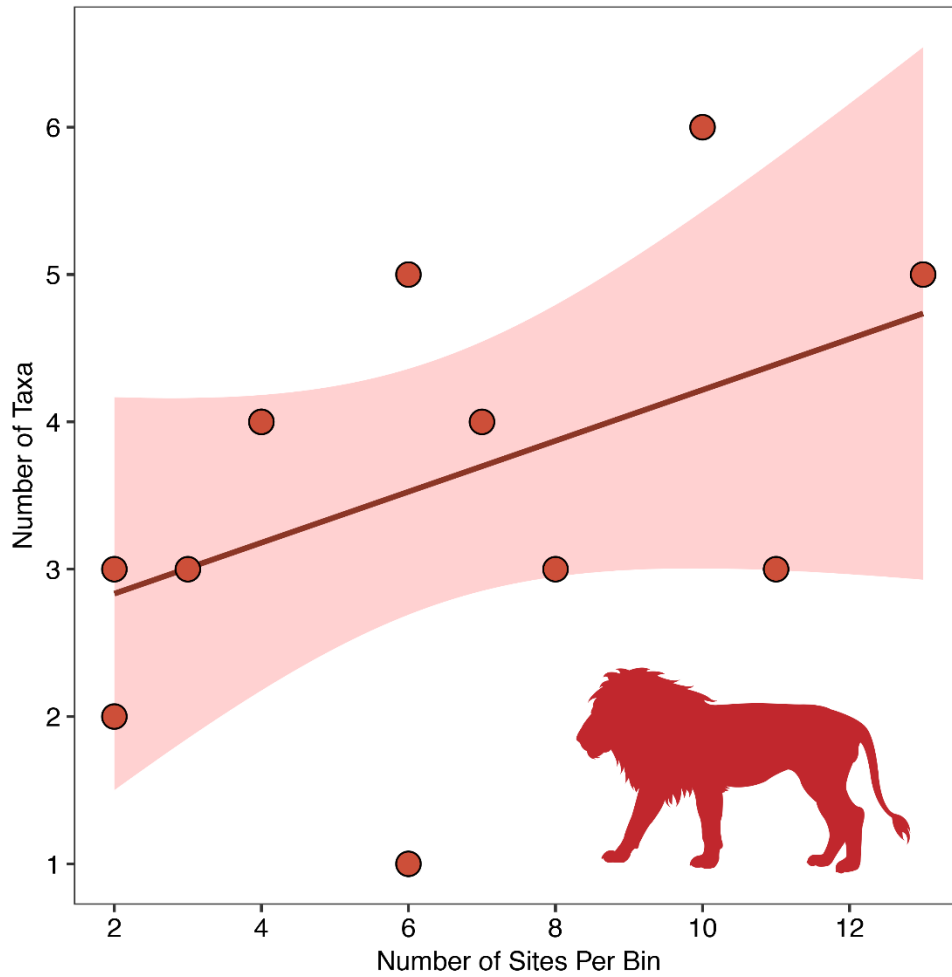

Fig. S3. The relationships between the number of fossil sites and the number of large carnivore (> 100 kg) taxa across 0.5 Myr time bins. Solid line indicates the ordinary least-squares regression.

Table S1. Modern African herbivore communities. Site codes correspond to those used in Dataset S1, which provides the taxonomic data.

| Site                                               | Code    | Latitude | Longitude |
|----------------------------------------------------|---------|----------|-----------|
| Aberdares NP, Kenya                                | ABER    | -0.24    | 36.5      |
| Abijatta-Shalla Lakes NP, Ethiopia                 | ABI-SHA | 7.3      | 38.3      |
| Abou Telfane Faunal Reserve, Chad                  | ABTL    | 12.1     | 18.88     |
| Addax Sanctuary, Niger                             | ADX     | 19.31    | 9.37      |
| Ai-Ais Hot Spring Game Park, Namibia               | AIHS    | -27.91   | 17.15     |
| Akagera NP, Rwanda                                 | AKA     | -1.65    | 30.69     |
| Amboseli NP, Kenya                                 | AMB     | -2.38    | 37.14     |
| Luiana National Park, Angola                       | ANG     | -15.5    | 15.3      |
| Reserve Temporaire de Faune d'Ansongo-Menaka, Mali | ANME    | 15.55    | 1.7       |
| Arly Partial Faunal Reserve, Burkina Faso          | APFR    | 11.39    | 1.16      |
| Arawale NR, Kenya                                  | ARAW    | -1.43    | 40.15     |
| Arusha NP, Tanzania                                | ARU     | -3.25    | 36.83     |
| Arly Total Faunal Reserve, Burkina Faso            | ATFR    | 11.56    | 1.44      |
| Aïr and Ténéré National Nature Reserve, Niger      | ATNR    | 18.83    | 9.47      |
| Awash NP, Ethiopia                                 | AWA     | 9.2      | 40.2      |
| Badiar NP, Guinea                                  | BAD     | 12.34    | -13.17    |
| Baie de Khnifiss, Morocco                          | BAIE    | 28.01    | -12.27    |
| Bale Mountains NP, Ethiopia                        | BALE    | 6.4      | 39.4      |
| Banc d'Arguin, Mauritania                          | BANC    | -11.53   | 30.72     |
| Bangweulu Swamps, Zambia                           | BAN     | 20.23    | -16.11    |
| Bahr Salamat Faunal Reserve, Chad                  | BASA    | 10.59    | 19.42     |
| Bazaruto NP, Mozambique                            | BAZ     | -21.75   | 35.43     |
| Boumba Bek/Neki NPs, Cameroon                      | BBN     | 2.51     | 14.72     |
| Belezma NP, Algeria                                | BELZ    | 35.59    | 6.04      |
| Benoue NP, Cameroon                                | BEN     | 8.36     | 13.82     |
| Bururi Forest NR, Burundi                          | BF      | -3.94    | 29.6      |
| Banhine NP, Mozambique                             | BHINE   | -22.9    | 32.86     |
| Bikuar NP, Angola                                  | BIK     | -15.28   | 14.76     |
| Binder- Léré Faunal Reserve, Chad                  | BIN     | 9.63     | 14.41     |
| Bonioli Total Faunal Reserve, Burkina Faso         | BON     | 10.86    | -3.11     |
| Bou-Hedma NP, Tunisia                              | BOUH    | 34.47    | 9.61      |
| Budongo forest, Uganda                             | BUD     | 1.73     | 31.55     |
| Bufalo Partial Reserve, Angola                     | BUF     | -12.78   | 13.81     |
| Chambi NP, Tunisia                                 | CHAM    | 35.18    | 8.71      |
| Chobe NP, Botswana                                 | CHO     | -18      | 24.5      |
| Cliffs of Bandiagara, Mali                         | CLB     | 14.41    | -3.4      |
| Campo Ma'an NP, Cameroon                           | CMA     | 2.46     | 10.3      |
| Comoé NP, Ivory Coast                              | COM     | 9.06     | 3.42      |
| Conkouati- Douli NP, Congo                         | CON     | -3.9     | 11.45     |
| Congo Basin, DRC                                   | CONG    | 2.5      | 22        |
| East of Cross River, Nigeria                       | CROS    | 5        | 6         |
| Deux Bales NP, Burkina Faso                        | DEUX    | 11.59    | -2.97     |
| Diawling NP, Mauritania                            | DIAW    | 16.31    | -16.4     |
| Djurdjura NP, Algeria                              | DJU     | 36.46    | 4.16      |
| Daan Viljoen Game Park, Namibia                    | DVGP    | -22.53   | 16.96     |
| (Gebel) Elba NP, Egypt                             | ELB     | 22.9     | 35.75     |
| East of Niger River, Nigeria                       | ENIG    | 5        | 7.5       |



|                                                            |       |        |        |
|------------------------------------------------------------|-------|--------|--------|
| Etosha NP, Namibia                                         | ETO   | -19    | 15.75  |
| Fada Archei Fauna Reserve, Chad                            | FADA  | 16.96  | 21.4   |
| Gadabedji Faunal Reserve, Niger                            | GAD   | 15.14  | 7.15   |
| Gambela NP, Ethiopia                                       | GAM   | 8      | 34     |
| Garamba NP, Democratic Rep. of Congo                       | GAR   | 4.19   | 29.48  |
| Kgalagadi Transfrontier NP, South Africa                   | GEM   | -25.7  | 20.4   |
| Ghonarezhou NP, Zimbabwe                                   | GHO   | -21.66 | 31.86  |
| Gile GR, Mozambique                                        | GILE  | -16.53 | 38.44  |
| Gishwati Forest Reserve, Rwanda                            | GISH  | -1.75  | 29.42  |
| Golden Gate NP, South Africa                               | GOLD  | -28.3  | 28.4   |
| Gombe NP, Tanzania                                         | GOMB  | -4.66  | 29.63  |
| Gorongosa NP, Mozambique                                   | GOR   | -18.83 | 34.51  |
| Guinea Woodland, Nigeria                                   | GUS   | 7.5    | 7.5    |
| Hadar, Ethiopia                                            | HAD   | 11.6   | 40     |
| Hluhluwe NP, South Africa                                  | HLU   | -28.2  | 31.5   |
| Hwange NP, Zimbabwe                                        | HWA   | -19.19 | 26.62  |
| Iles Tristao Wetlands of International Importance, Guinea  | ILES  | 10.95  | -14.95 |
| Iona NP, Angola                                            | IONA  | -16.5  | 12.54  |
| Lake Mweru, Zambia                                         | ITG   | -8.4   | 29.2   |
| Kabore-Tambi National Park, Burkina Faso                   | KAB   | 11.5   | -1.25  |
| Kafue Flats, Zambia                                        | KAFF  | -15.5  | 25.4   |
| Kakamenga National Park, Kenya                             | KAK   | 0.3    | 34.85  |
| Kalahari Thornveld (Tswalu Kalahari Reserve), South Africa | KALT  | -25.62 | 20.43  |
| Kameia NP, Angola                                          | KAM   | -11.85 | 21.67  |
| Kangandala NP, Angola                                      | KANG  | -9.81  | 16.77  |
| Kapama NP, South Africa                                    | KAP   | -24.3  | 31     |
| Kasungu NP, Malawi                                         | KAS   | -12.56 | 33.84  |
| Kibira NP, Burundi                                         | KBIR  | -3.6   | 29.32  |
| Kabalega/Murchison Falls NP, Uganda                        | KFAL  | 2.25   | 31.8   |
| Kafue NP, Zambia                                           | KFNP  | -14.4  | 26.13  |
| Khaudom NP, Namibia                                        | KHA   | -18.75 | 20.76  |
| Kibale NP, Uganda                                          | KIB   | 0.53   | 30.38  |
| Kidepo NP, Uganda                                          | KID   | 3.53   | 33.5   |
| Kilimanjaro, Tanzania                                      | KILI  | -3     | 37.5   |
| Kisama NP, Angola                                          | KIS   | -9.77  | 13.62  |
| Kizigo GR, Tanzania                                        | KIZ   | -6.37  | 34.28  |
| Kruger NP, South Africa                                    | KNP   | -24    | 31.4   |
| Knysna/Wilderness NP, South Africa                         | KNYS  | -33.5  | 22.6   |
| Korup NP, Cameroon                                         | KOR   | 5.1    | 8.51   |
| Kourtiagou Partial Forest Reserve, Burkina Faso            | KOU   | 11.55  | 1.95   |
| Lac d'Afenmourir, Morocco                                  | LACA  | 33.33  | -5.17  |
| Lac Fitri (Wetlands of International Importance), Chad     | LACF  | 12.79  | 17.44  |
| Réserve Intégrale du Lac Ouberia, Algeria                  | LACO  | 36.84  | 8.39   |
| Réserve Intégrale du Lac Tonga, Algeria                    | LACT  | 36.86  | 8.5    |
| Lake Chilwa Wetlands, Malawi                               | LCHIL | -15.16 | 35.41  |
| Lefini Faunal Reserve, Congo                               | LEF   | -2.96  | 15.42  |
| Lengwe NP, Malawi                                          | LEN   | -16.16 | 34.45  |
| Linyanti Swamp, Botswana                                   | LIN   | -18.11 | 23.24  |
| Liwonde NP, Malawi                                         | LIW   | -14.5  | 35.2   |
| Lake Magadi, Great Rift Valley, Kenya                      | LMAG  | -1.86  | 36.26  |

|                                                                    |      |        |        |
|--------------------------------------------------------------------|------|--------|--------|
| Lake Manyara NP, Tanzania                                          | LMNY | -3.5   | 35.83  |
| Lake Nkuru, Kenya                                                  | LNAK | -1     | 36.5   |
| Lake Naivasha & Hell's Gate NP, Great Rift Valley, Kenya           | LNHG | -0.88  | 36.3   |
| Lopé Reserve, Gabon                                                | LOP  | -0.16  | 11.85  |
| Lac Télé Community Reserve, Congo                                  | LTCR | 1.1    | 17.26  |
| Luando Integral Nature Reserve, Angola                             | LUA  | -11.11 | 17.62  |
| Madjoari (Total Faunal) Reserve, Burkina Faso                      | MAD  | 11.37  | 1.27   |
| Mago NP, Ethiopia                                                  | MAGO | 5.4    | 36.1   |
| Mahango Game Reserve, Namibia                                      | MAH  | -18.22 | 21.66  |
| Majete WR, Malawi                                                  | MAJ  | -15.56 | 34.35  |
| Makakou, Gabon                                                     | MAK  | -0.66  | 12.72  |
| Mamili NP, Namibia                                                 | MAM  | -18.41 | 23.68  |
| Mana Pools NP, Zimbabwe                                            | MAN  | -15.98 | 29.44  |
| Manda NP, Chad                                                     | MAND | 9.32   | 19.97  |
| Maputo GR, Mozambique                                              | MAP  | -26.39 | 32.81  |
| Mare aux Hippopotames Bird Reserve, Burkina Faso                   | MARE | 11.59  | -4.15  |
| Marromeu GR, Mozambique                                            | MARO | -18.77 | 35.95  |
| Marsabit NP, Kenya                                                 | MARS | 2.32   | 37.98  |
| Massif du Ziama NR, Guinea                                         | MASF | 8.3    | -9.36  |
| Masai Mara, Kenya                                                  | MASM | -1.3   | 35.1   |
| Matusadona NP, Zimbabwe                                            | MAT  | -16.95 | 28.61  |
| Matobo NP, Zimbabwe                                                | MATO | -20.55 | 28.54  |
| Mavinga Partial Reserve, Angola                                    | MAV  | -15.5  | 20.93  |
| Mbam et Djerem NP, Cameroon                                        | MED  | 5.86   | 12.77  |
| Meru NP, Kenya                                                     | MER  | 0.08   | 38.33  |
| Manovo-Gounda-Saint Floris National Park, Central African Republic | MGSF | 8.89   | 21.43  |
| Mahale Mountain National Park, Tanzania                            | MHA  | -6.12  | 29.5   |
| Mikumi NP, Tanzania                                                | MIKU | -7.2   | 37.13  |
| Mandelia Faunal Reserve, Chad                                      | MNDL | 11.56  | 15.22  |
| Mount Nimba Strict NR, Guinea                                      | MNIM | 7.4    | -8.23  |
| Mocamedes Partial Reserve, Angola                                  | MOC  | -15.71 | 12.4   |
| Merja Sidi Boughaba, Morocco                                       | MSID | 34.23  | -6.68  |
| Mount Assirik, Senegal                                             | MTAS | 12.88  | -12.76 |
| Mount Elgon NP, Kenya                                              | MTE  | 1.13   | 34.7   |
| Mont Fouari Faunal Reserve, Congo                                  | MTFO | -2.78  | 11.67  |
| Mount Kenya NP, Kenya                                              | MTK  | -0.12  | 37.32  |
| Mudumu NP, Namibia                                                 | MUD  | -18.09 | 23.53  |
| Mupa NP, Angola                                                    | MUPA | -15.91 | 15.59  |
| Mushandike Sanctuary, Zimbabwe                                     | MUSH | -8.68  | 29.44  |
| Mweru-Wantipa, Zambia                                              | MWA  | -8.41  | 29.26  |
| Mwabvi WR, Malawi                                                  | MWAB | -16.72 | 35.01  |
| Merja Zerga Biological Reserve, Morocco                            | MZER | 34.85  | -6.29  |
| Nairobi NP, Kenya                                                  | NAI  | -1.37  | 36.85  |
| Namib Desert, Namibia                                              | NAM  | -21.5  | 14.4   |
| Natal Woodland, South Africa                                       | NAT  | -27.4  | 32.15  |
| Namib Naukluft Game Park, Namibia                                  | NAUK | -24.58 | 15.43  |
| Ngorongoro Crater Conservation Area, Tanzania                      | NGCR | -3.2   | 35.46  |
| Ngotto Forest, Central African Republic                            | NGO  | 3.96   | 17.01  |
| Niassa GR, Mozambique                                              | NIA  | -12.24 | 36.98  |
| Nkhota-Kota WR, Malawi                                             | NKK  | -12.88 | 34.02  |

|                                                        |      |        |        |
|--------------------------------------------------------|------|--------|--------|
| Nouabalé-Ndoki NP, Congo                               | NOU  | 2.52   | 16.6   |
| Nyanga Nord Faunal Reserve, Congo                      | NYG  | -2.81  | 12     |
| Nyika NP, Malawi                                       | NYK  | -10.8  | 33     |
| Nyungwe Forest Reserve, Rwanda                         | NYU  | -2.56  | 29.21  |
| Odzala-Koukoua NP, Congo                               | ODZ  | 0.89   | 14.88  |
| Okavango Delta, Botswana                               | OKA  | -19    | 23     |
| Olifants Sub-Region of Kruger NP, South Africa         | OLI  | -24    | 31.4   |
| El Omayed Biosphere Reserve, Egypt                     | OMBR | 30.75  | 29.15  |
| Omo NP, Ethiopia                                       | OMO  | 6.03   | 35.76  |
| Ouadi Rimé- Ouadi Achim Faunal Reserve, Chad           | OROA | 15.77  | 19     |
| Pama Partial Faunal Reserve, Burkina Faso              | PAMA | 11.4   | 0.82   |
| Qarun Lake NR, Egypt                                   | QLNR | 29.56  | 30.61  |
| Ras Mohammed NP, Egypt                                 | RMOH | 27.88  | 34.34  |
| Rio Pongo Wetlands of International Importance, Guinea | RPON | 10.12  | -14.17 |
| Ruaha NP, Tanzania                                     | RUA  | -7.5   | 35     |
| Rukwa Valley, Tanzania                                 | RUK  | -7     | 31.2   |
| Rusizi NP, Burundi                                     | RUS  | -3.24  | 29.25  |
| Ruvubu NP, Burundi                                     | RUV  | -3.13  | 30.38  |
| Rwenzori NP, Uganda                                    | RWEN | 0.13   | 30     |
| Sahel Partial Faunal Reserve, Burkina Faso             | SAHB | 14.54  | -0.64  |
| Sahel Savanna, Nigeria                                 | SAH  | 13.3   | 13.2   |
| Salongo NP, Democratic Rep. of Congo                   | SALO | -2.36  | 20.97  |
| Samburu NR, Kenya                                      | SAM  | 0.57   | 37.57  |
| Serengeti Bushland, Tanzania                           | SBS  | -2     | 34     |
| Selous GR, Tanzania                                    | SELO | -8.86  | 37.41  |
| Shimba Hills NR, Kenya                                 | SHIM | -4.21  | 39.41  |
| Simien Mountain NP, Ethiopia                           | SIM  | 13.11  | 38.04  |
| Singou Total Faunal Reserve, Burkina Faso              | SING | 11.64  | 0.98   |
| Siniaka-Minia Faunal Reserve, Chad                     | SINM | 10.42  | 18.2   |
| Skeleton Coast Park, Namibia                           | SKE  | -19.17 | 12.84  |
| Arabuko-Sokoke Forest, Kenya                           | SOK  | -3.33  | 39.86  |
| Serengeti Plains, Tanzania                             | SP   | -2.19  | 34.5   |
| SS Grasslands, South Africa                            | SSG  | -26.35 | 25.4   |
| Sudan Woodland, Nigeria                                | SUD  | 10     | 7.5    |
| Southwest Arid (Nama Karoo), South Africa              | SWA  | -26    | 20     |
| Tai Forest, Ivory Coast                                | TAI  | 5.35   | -7.1   |
| Talassamtane NP, Morocco                               | TALA | 35.18  | -5.21  |
| Tamou Total Reserve, Niger                             | TAM  | 12.62  | 2.31   |
| Tarangire NP, Tanzania                                 | TAR  | -4     | 36     |
| Tassili N'Ajjer NP, Algeria                            | TAS  | 24.64  | 9.7    |
| Tongwe NP, Tanzania (Ugalla River Game Reserve)        | TON  | -5.46  | 31.8   |
| Tsavo NP, Kenya                                        | TSA  | -2.52  | 38.5   |
| Tsoulou Faunal Reserve, Congo                          | TSO  | -3.62  | 12.46  |
| Volcans NP, Rwanda/DRC                                 | VOL  | -1.45  | 29.42  |
| Vwaza Marsh WR, Malawi                                 | VWA  | -11    | 33.45  |
| Wadi el Assuiti, Egypt                                 | WAS  | 27.13  | 31.37  |
| Waza NP, Cameroon                                      | WAZ  | 11.29  | 14.69  |
| W du Burkina Faso NP , Burkina Faso                    | WBKF | 11.91  | 2.2    |
| West Lunga NP, Zambia                                  | WLU  | -12.48 | 24.45  |
| West of Niger River, Nigeria                           | WNI  | 6.5    | 6      |

|                                                  |         |        |       |
|--------------------------------------------------|---------|--------|-------|
| W' du Niger NP, Niger                            | WNIG    | 12.52  | 2.66  |
| Waterberg Plateau Park, Namibia                  | WPP     | -20.44 | 17.25 |
| Wadi el Rayan, Egypt                             | WRAY    | 29.2   | 30.28 |
| Yangudi-Rasa NP, Ethiopia                        | YAN-RUS | 11     | 40.5  |
| Zakouma NP, Chad                                 | ZAK     | 10.85  | 19.7  |
| Zemongo Faunal Reserve, Central African Republic | ZEM     | 6.59   | 25.25 |
| Zinave NP, Mozambique                            | ZIN     | -21.59 | 33.54 |

---

Table S2. Eastern African fossil sites spanning the last 7 Myr. See Dataset S2 for taxonomic data.

| Site         | Country  | Lat   | Long  | Formation/Sequence | Min. Age | Max. Age | Mean Age | Age Ref(s).       | Faunal Ref(s).           |
|--------------|----------|-------|-------|--------------------|----------|----------|----------|-------------------|--------------------------|
| Amboseli     | Kenya    | -2.60 | 37.30 | OI Tukai Beds      | 0.031    | 0.049    | 0.040    | (8)               | (19)                     |
| Apak         | Kenya    | 2.90  | 36.05 | Nachukui Fm        | 4.200    | 5.000    | 4.600    | (20)              | (21-23)                  |
| Aramis       | Ethiopia | 10.30 | 40.30 | Sagantole Fm       | 4.400    | 4.400    | 4.400    | (24)              | (20, 25, 26)             |
| Asa Koma     | Ethiopia | 10.30 | 40.26 | Adu-Asa Fm         | 5.540    | 5.770    | 5.655    | (27)              | (23, 28, 29)             |
| Asbole       | Ethiopia | 11.05 | 40.67 | Busidima Fm        | 0.600    | 0.800    | 0.700    | (30)              | (30, 31)                 |
| Bed I        | Tanzania | -2.98 | 35.30 | Olduvai Gorge      | 1.800    | 2.038    | 1.919    | (32)              | (22, 33-38)              |
| Bed III      | Tanzania | -2.98 | 35.30 | Olduvai Gorge      | 0.800    | 1.200    | 1.000    | (39)              | (22, 36-38, 40)          |
| Bed IV       | Tanzania | -2.98 | 35.30 | Olduvai Gorge      | 0.600    | 0.800    | 0.700    | (39)              | (22, 36-38, 40)          |
| Boolithinan  | Ethiopia | 11.15 | 40.32 | Busidima Fm        | 1.500    | 1.700    | 1.600    | (41)              | (41)                     |
| C Island     | Kenya    | -0.81 | 36.41 | Crescent Island    | -        | -        | 0.005    | Holocene mean age | (42)                     |
| Chari        | Kenya    | 4.00  | 36.37 | Koobi Fora Fm      | 0.750    | 1.380    | 1.065    | (43)              | (44, 45)                 |
| Chemeron     | Kenya    | -0.57 | 35.95 | Chemeron Fm        | 4.300    | 5.300    | 4.800    | (39)              | (20, 22, 33, 35, 46, 47) |
| Mabaget      |          |       |       |                    |          |          |          |                   |                          |
| Daka         | Ethiopia | 10.28 | 40.53 | Bouri Fm           | 0.966    | 1.040    | 1.003    | (48)              | (48, 49)                 |
| Danauli      | Ethiopia | 11.10 | 40.58 | Busidima Fm        | -        | -        | 2.000    | (8)               | (8)                      |
| Dark         | Ethiopia | 11.15 | 40.32 | Busidima Fm        | 0.900    | 1.400    | 1.150    | (41)              | (41)                     |
| Paleosol     |          |       |       |                    |          |          |          |                   |                          |
| Denen Dora   | Ethiopia | 11.10 | 40.58 | Hadar Fm           | 3.120    | 3.240    | 3.180    | (50)              | (51-55)                  |
| EyM DBS      | Kenya    | -0.78 | 36.22 | Enkapune ya Muto   | -        | -        | 0.005    | Holocene mean age | (42)                     |
| EyM RBL2.1   | Kenya    | -0.78 | 36.22 | Enkapune ya Muto   | -        | -        | 0.005    | Holocene mean age | (42)                     |
| Garba IV     | Ethiopia | 9.56  | 39.11 | Melka Kunture      | 0.800    | 1.000    | 0.900    | (39)              | (56)                     |
| Gogo 3       | Kenya    | -0.54 | 34.35 | Gogo Falls         | -        | -        | 0.005    | Holocene mean age | (42)                     |
| Gombore I    | Ethiopia | 9.56  | 39.11 | Melka Kunture      | 1.600    | 1.700    | 1.650    | (57)              | (56)                     |
| Gurumaha     | Ethiopia | 11.40 | 40.90 | Lee Adoyta Basin   | 2.750    | 2.820    | 2.785    | (58)              | (58-61)                  |
| GvJm19 Hol   | Kenya    | -1.47 | 37.08 | Lukenya Hill       | -        | -        | 0.005    | Holocene mean age | (42)                     |
| GvJm19 Pleis | Kenya    | -1.47 | 37.08 | Lukenya Hill       | -        | -        | 0.014    | (62)              | (42)                     |
| GvJm22 Hol   | Kenya    | -1.47 | 37.08 | Lukenya Hill       | -        | -        | 0.005    | Holocene mean age | (42)                     |
| GvJm22 Pleis | Kenya    | -1.47 | 37.08 | Lukenya Hill       | 0.026    | 0.046    | 0.036    | (63)              | (42)                     |
| GvJm46 Pleis | Kenya    | -1.47 | 37.08 | Lukenya Hill       | -        | -        | 0.040    | (62)              | (42)                     |
| Hata         | Ethiopia | 10.28 | 40.53 | Bouri Fm           | 2.500    | 2.500    | 2.500    | (64)              | (60, 64-66)              |
| Ibole        | Tanzania | -3.80 | 33.58 | Wembere-Manonga Fm | 5.000    | 5.500    | 5.250    | (39)              | (20, 67)                 |

|                |          |       |       |                          |       |       |       |                   |                  |
|----------------|----------|-------|-------|--------------------------|-------|-------|-------|-------------------|------------------|
| Kada Hadar     | Ethiopia | 11.10 | 40.58 | Hadar Fm                 | 2.950 | 3.120 | 3.035 | (50)              | (51-55)          |
| Kaitio         | Kenya    | 2.90  | 36.05 | Nachukui Fm              | 1.550 | 1.870 | 1.710 | (43)              | (44)             |
| Kaiyumung      | Kenya    | 2.90  | 36.05 | Nachukui Fm              | 3.000 | 3.500 | 3.250 | (20)              | (21-23)          |
| Kalochoro      | Kenya    | 2.90  | 36.05 | Nachukui Fm              | 1.870 | 2.330 | 2.100 | (43)              | (44)             |
| Kanapoi        | Kenya    | 2.33  | 35.92 | Kanapoi Fm               | 4.070 | 4.170 | 4.120 | (68)              | (20, 22, 69, 70) |
| Kantis         | Kenya    | -1.39 | 36.72 | Indet.                   | 3.400 | 3.500 | 3.450 | (71)              | (71)             |
| Karungu        | Kenya    | -0.83 | 34.15 | -                        | 0.035 | 0.100 | 0.068 | (72, 73)          | (74)             |
| Kataboi        | Kenya    | 2.90  | 36.05 | Nachukui Fm              | 3.440 | 3.970 | 3.705 | (43)              | (44)             |
| KBS            | Kenya    | 4.00  | 36.37 | Koobi Fora Fm            | 1.530 | 1.870 | 1.700 | (43)              | (37, 44)         |
| Kibish I       | Ethiopia | 5.00  | 36.00 | Kibish Fm                | -     | -     | 0.198 | (75)              | (76, 77)         |
| Kibish III     | Ethiopia | 5.00  | 36.00 | Kibish Fm                | -     | -     | 0.104 | (75)              | (76, 77)         |
| Kibish IV      | Ethiopia | 5.00  | 36.00 | Kibish Fm                | 0.008 | 0.012 | 0.010 | (75)              | (76, 77)         |
| Kiloleli       | Tanzania | -3.80 | 33.58 | Wembere-Manonga Fm       | 4.000 | 4.500 | 4.250 | (39)              | (20, 67)         |
| Konso 1        | Ethiopia | 5.30  | 37.40 | Konso Fm                 | 1.800 | 1.900 | 1.850 | (78)              | (78)             |
| Konso 2        | Ethiopia | 5.30  | 37.40 | Konso Fm                 | 1.700 | 1.800 | 1.750 | (78)              | (78)             |
| Konso 3        | Ethiopia | 5.30  | 37.40 | Konso Fm                 | 1.500 | 1.600 | 1.550 | (78)              | (78)             |
| Konso 4        | Ethiopia | 5.30  | 37.40 | Konso Fm                 | 1.400 | 1.500 | 1.450 | (78)              | (78)             |
| Konso 5        | Ethiopia | 5.30  | 37.40 | Konso Fm                 | 1.300 | 1.400 | 1.350 | (78)              | (78)             |
| Konso 6        | Ethiopia | 5.30  | 37.40 | Konso Fm                 | 0.700 | 1.300 | 1.000 | (78)              | (78)             |
| Kuseralee      | Ethiopia | 10.43 | 40.45 | Sagantole Fm             | -     | -     | 5.200 | (29)              | (23, 28, 29)     |
| Lainyamok      | Kenya    | -1.79 | 36.20 | -                        | 0.320 | 0.390 | 0.355 | (79)              | (30)             |
| Lee Adoyta     | Ethiopia | 11.40 | 40.90 | Lee Adoyta Basin         | 2.580 | 2.670 | 2.625 | (58)              | (58-61)          |
| Lemudongo      | Kenya    | 1.30  | 35.95 | Lemudongo Fm             | -     | -     | 6.000 | (80)              | (80)             |
| Lokalalei      | Kenya    | 2.90  | 36.05 | Nachukui Fm              | 2.330 | 2.530 | 2.430 | (43)              | (22, 44)         |
| Lokochot       | Kenya    | 4.00  | 36.37 | Koobi Fora Fm            | 3.440 | 3.600 | 3.520 | (43)              | (37, 44)         |
| Lonyumun       | Kenya    | 4.00  | 36.37 | Koobi Fora & Nachukui Fm | 3.970 | 4.000 | 3.985 | (43)              | (37, 44)         |
| Lower Laetolil | Tanzania | -3.20 | 35.20 | Laetolil Beds            | 3.850 | 4.360 | 4.105 | (81)              | (82)             |
| Lower Lomekwi  | Kenya    | 2.90  | 36.05 | Nachukui Fm              | 3.130 | 3.440 | 3.285 | (43)              | (22, 44)         |
| Lower Nawata   | Kenya    | 2.90  | 36.05 | Nawata Fm                | 6.500 | 7.400 | 6.950 | (39)              | (21-23)          |
| Lower Bed II   | Tanzania | -2.98 | 35.30 | Olduvai Gorge            | 1.740 | 1.790 | 1.765 | (83)              | (36, 83)         |
| Luanda         | Kenya    | 0.02  | 34.59 | Luanda                   | -     | -     | 0.005 | Holocene mean age | (42)             |
| Lukeino        | Kenya    | -0.79 | 35.86 | Lukeino Fm               | 5.730 | 6.140 | 5.935 | (39)              | (20, 22, 47, 84) |
| Makaamitalu    | Ethiopia | 11.10 | 40.58 | Busidima Fm              | -     | -     | 2.350 | (85)              | (8)              |

|                 |          |       |       |                               |       |       |       |                                                         |              |
|-----------------|----------|-------|-------|-------------------------------|-------|-------|-------|---------------------------------------------------------|--------------|
| Marula          | Kenya    | -0.78 | 36.22 | Marula Rockshelter            | -     | -     | 0.005 | Holocene mean age                                       | (42)         |
| Mb A            | Ethiopia | 5.00  | 36.00 | Shungura Fm                   | 3.440 | 3.600 | 3.520 | (43)                                                    | (20, 38)     |
| Mb B            | Ethiopia | 5.00  | 36.00 | Shungura Fm                   | 2.970 | 3.440 | 3.205 | (43)                                                    | (20, 22, 38) |
| Mb C            | Ethiopia | 5.00  | 36.00 | Shungura Fm                   | 2.530 | 3.070 | 2.800 | (43)                                                    | (20, 22, 38) |
| Mb D            | Ethiopia | 5.00  | 36.00 | Shungura Fm                   | 2.440 | 2.530 | 2.485 | (43)                                                    | (22, 38, 66) |
| Mb E            | Ethiopia | 5.00  | 36.00 | Shungura Fm                   | 2.320 | 2.400 | 2.360 | (43)                                                    | (22, 38, 66) |
| Mb F            | Ethiopia | 5.00  | 36.00 | Shungura Fm                   | 2.270 | 2.320 | 2.295 | (43)                                                    | (22, 38, 66) |
| Mb G            | Ethiopia | 5.00  | 36.00 | Shungura Fm                   | 1.870 | 2.270 | 2.070 | (43)                                                    | (22, 38, 66) |
| Mb H            | Ethiopia | 5.00  | 36.00 | Shungura Fm                   | 1.760 | 1.870 | 1.815 | (43)                                                    | (22, 38, 66) |
| Mb J            | Ethiopia | 5.00  | 36.00 | Shungura Fm                   | 1.530 | 1.760 | 1.645 | (43)                                                    | (22, 38)     |
| Mb K            | Ethiopia | 5.00  | 36.00 | Shungura Fm                   | 1.380 | 1.530 | 1.455 | (43)                                                    | (22, 38)     |
| Mb L            | Ethiopia | 5.00  | 36.00 | Shungura Fm                   | 1.000 | 1.380 | 1.190 | (43)                                                    | (22, 38)     |
| Mfangano        | Kenya    | -0.47 | 34.07 | Waware Beds                   | 0.035 | 0.100 | 0.068 | (72, 73)                                                | (86)         |
| Middle Lomekwi  | Kenya    | 2.90  | 36.05 | Nachukui Fm                   | 2.820 | 3.130 | 2.975 | (43) Interpolation<br>(Division of Mb into three units) | (22, 44)     |
| Moiti           | Kenya    | 4.00  | 36.37 | Koobi Fora Fm                 | 3.600 | 3.970 | 3.785 | (43)                                                    | (44)         |
| Mpesida         | Kenya    | 0.67  | 36.00 | Mpesida Beds                  | 6.200 | 7.000 | 6.600 | (39)                                                    | (20, 22, 47) |
| Mursi           | Ethiopia | 6.00  | 36.00 | Mursi Fm                      | -     | -     | 4.000 | (87)                                                    | (87)         |
| Naivasha RW     | Kenya    | -0.81 | 36.41 | Naivasha Railway Rock Shelter | -     | -     | 0.005 | Holocene mean age                                       | (42)         |
| Nariokotome     | Kenya    | 2.90  | 36.05 | Nachukui Fm                   | 0.750 | 1.300 | 1.025 | (43)                                                    | (44)         |
| Narosura        | Kenya    | -1.54 | 35.86 | Narosura                      | -     | -     | 0.005 | Holocene mean age                                       | (42)         |
| Natoo           | Kenya    | 2.90  | 36.05 | Nachukui Fm                   | 1.300 | 1.550 | 1.425 | (43)                                                    | (44)         |
| Ngenyn 3        | Kenya    | 0.60  | 36.01 | Ngenyn                        | -     | -     | 0.005 | Holocene mean age                                       | (42)         |
| Okote           | Kenya    | 4.00  | 36.37 | Koobi Fora Fm                 | 1.380 | 1.530 | 1.455 | (43)                                                    | (37, 44)     |
| Olkesiteti      | Kenya    | -1.58 | 36.43 | Oltulelei Fm                  | 0.295 | 0.320 | 0.308 | (88)                                                    | (88)         |
| Ologesailie     | Kenya    | -1.58 | 36.43 | Ologesailie Fm                | 0.500 | 1.000 | 0.750 | (89)                                                    | (88)         |
| Prolonged Drift | Kenya    | -0.49 | 36.09 | Prolonged Drift               | -     | -     | 0.005 | Holocene mean age                                       | (42)         |
| Rusinga         | Kenya    | -0.41 | 34.18 | Wasiriya Beds                 | 0.035 | 0.100 | 0.068 | (72, 73)                                                | (86)         |
| Shulumai        | Kenya    | -0.10 | 37.29 | Shulumai Rockshelter          | -     | -     | 0.005 | Holocene mean age                                       | (42)         |
| Sidi Hakoma     | Ethiopia | 11.10 | 40.58 | Hadar Fm                      | 3.240 | 3.420 | 3.330 | (50)                                                    | (51-55)      |
| South Turkwell  | Kenya    | 2.90  | 36.05 | Nachukui Fm                   | 3.200 | 3.580 | 3.390 | (90)                                                    | (38)         |
| Tinde           | Tanzania | -3.80 | 33.58 | Wembere-Manonga Fm            | 4.500 | 5.000 | 4.750 | (39)                                                    | (20, 67)     |
| Tulu Bor        | Kenya    | 4.00  | 36.37 | Koobi Fora Fm                 | 2.640 | 3.440 | 3.040 | (43)                                                    | (37, 44)     |

|                |          |       |       |               |       |       |       |      |          |
|----------------|----------|-------|-------|---------------|-------|-------|-------|------|----------|
| Upper Laetolil | Tanzania | -3.20 | 35.20 | Laetolil Beds | 3.600 | 3.850 | 3.725 | (81) | (82)     |
| Upper Lomekwi  | Kenya    | 2.90  | 36.05 | Nachukui Fm   | 2.530 | 2.820 | 2.675 | (43) | (44)     |
| Upper Nawata   | Kenya    | 2.90  | 36.05 | Nawata Fm     | 5.000 | 6.500 | 5.750 | (39) | (21-23)  |
| Upper Ndolanya | Tanzania | -3.20 | 35.20 | Ndolanya Beds | 2.660 | 2.660 | 2.660 | (81) | (82)     |
| Upper Bed II   | Tanzania | -2.98 | 35.30 | Olduvai Gorge | 1.200 | 1.740 | 1.470 | (83) | (36, 83) |
| Upper Burgi    | Kenya    | 4.00  | 36.37 | Koobi Fora Fm | 1.870 | 2.000 | 1.935 | (43) | (37, 44) |
| Usno           | Ethiopia | 4.50  | 36.00 | Usno Fm       | 3.000 | 3.300 | 3.150 | (39) | (38)     |



Table S3. The occurrence of large carnivorans (>100 kg) across 0.5 Myr time bins, with references for body mass estimate and representative sites for each bin. Tally of species richness based on total number of non-overlapping taxa (occurrences in red do not count as a distinct species for the given time bin); number of sites per bin from Table S2. R = range-through taxon assumed to be present based on its occurrence in younger and older intervals.

| Taxon                                        | 0.5 to ≤ 1.0 | 1.0 to ≤ 1.5 | 1.5 to ≤ 2.0 | 2.0 to ≤ 2.5 | 2.5 to ≤ 3.0 | 3.0 to ≤ 3.5 | 3.5 to ≤ 4.0 | 4.0 to ≤ 4.5 | 4.5 to ≤ 5.0 | 5.0 to ≤ 5.5 | 5.5 to ≤ 6.0 | 6.5 to ≤ 7 | Mass Ref. | Sites Ref(s).         |
|----------------------------------------------|--------------|--------------|--------------|--------------|--------------|--------------|--------------|--------------|--------------|--------------|--------------|------------|-----------|-----------------------|
| <i>Homotherium</i> aff. <i>problematicum</i> | 0            | 0            | 0            | 1            | 0            | 0            | 0            | 0            | 0            | 0            | 0            | 0          | (91, 92)  | (64)                  |
| <i>Homotherium hadarensis</i>                | 0            | 0            | 0            | 0            | 0            | 1            | 0            | 0            | 0            | 0            | 0            | 0          | (91, 92)  | (93)                  |
| <i>Homotherium</i> sp.                       | 0            | 1            | 1            | 1            | 1            | 1            | 1            | 1            | 0            | 0            | 0            | 0          | (91, 92)  | (38, 71, 94, 95)      |
| <i>Lokotunjailurus emageritus</i>            | 0            | 0            | 0            | 0            | 0            | 0            | 0            | 0            | 0            | 0            | 1            | 1          | (96)      | (95)                  |
| <i>Machairodus</i> sp.*                      | 0            | 0            | 0            | 0            | 0            | 0            | 0            | 1            | R            | 1            | 1            | 0          | (97)      | (25, 98, 99)          |
| <i>Dinofelis aronoki</i>                     | 0            | 0            | 1            | R            | R            | 1            | 0            | 0            | 0            | 0            | 0            | 0          | (96)      | (94, 95)              |
| <i>Dinofelis diastemata</i>                  | 0            | 0            | 0            | 0            | 0            | 0            | 0            | 0            | 0            | 0            | 1            | 0          | (96)      | (100)                 |
| <i>Dinofelis petteri</i>                     | 0            | 0            | 0            | 0            | 1            | 1            | 1            | 1            | 0            | 0            | 0            | 0          | (96)      | (95)                  |
| <i>Dinofelis piveteaui</i>                   | 0            | 1            | 0            | 0            | 0            | 0            | 0            | 0            | 0            | 0            | 0            | 0          | (96)      | (94, 95)              |
| <i>Dinofelis</i> cf. <i>piveteaui</i>        | 0            | 1            | 1            | 0            | 0            | 0            | 0            | 0            | 0            | 0            | 0            | 0          | (96)      | (78)                  |
| <i>Dinofelis</i> sp.                         | 0            | 1            | 1            | 1            | 1            | 1            | 1            | R            | R            | 1            | 1            | 1          | (96)      | (44, 94, 95, 99, 101) |
| <i>Panthera leo</i>                          | 1            | 1            | 1            | 0            | 0            | 0            | 0            | 0            | 0            | 0            | 0            | 0          | (3)       | (94, 95)              |
| <i>Panthera</i> aff. <i>leo</i>              | 0            | 0            | 0            | 0            | 0            | 0            | 1            | 0            | 0            | 0            | 0            | 0          | (3)       | (82)                  |
| <i>Crocuta eturono</i>                       | 0            | 0            | 0            | 0            | 0            | 1            | 0            | 0            | 0            | 0            | 0            | 0          | (96)      | (94, 95)              |
| <i>Crocuta</i> cf. <i>eturono</i>            | 0            | 0            | 1            | R            | R            | 1            | 0            | 0            | 0            | 0            | 0            | 0          | (96)      | (94, 95)              |
| <i>Pachycrocuta brevirostris</i>             | 0            | 0            | 0            | 0            | 1            | 1            | 0            | 0            | 0            | 0            | 0            | 0          | (102)     | (95)                  |
| <i>Agriotherium aecuatorialis</i>            | 0            | 0            | 0            | 0            | 0            | 0            | 0            | 0            | 1            | 0            | 0            | 0          | (100)     | (100)                 |
| <i>Agriotherium</i> sp.                      | 0            | 0            | 0            | 0            | 0            | 0            | 0            | 1            | 0            | 1            | 1            | 0          | (100)     | (25, 99)              |
| cf. <i>Agriotherium</i> sp.                  | 0            | 0            | 0            | 0            | 0            | 1            | 1            | 0            | 0            | 0            | 0            | 0          | (100)     | (94)                  |
| Species Richness                             | 1            | 3            | 5            | 3            | 5            | 6            | 4            | 4            | 3            | 3            | 4            | 2          |           |                       |
| Number of Sites                              | 6            | 11           | 13           | 8            | 6            | 10           | 7            | 4            | 3            | 2            | 4            | 2          |           |                       |

\*The genus *Machairodus* has been reported from several late Miocene and early Pliocene sites in eastern Africa (25, 98, 99), though Sardella and Werdelin (103) suggest these remains are best placed in *Amphimachairodus* (see also 95).

## References for SI reference citations

1. J. M. Kamilar, L. Beaudrot, K. E. Reed, Climate and species richness predict the phylogenetic structure of African mammal communities. *PLoS One* **10**, e0121808 (2015).
2. J. Rowan, J. M. Kamilar, L. Beaudrot, K. E. Reed, Strong influence of palaeoclimate on the structure of modern African mammal communities. *Proceedings of the Royal Society B: Biological Sciences* **283**, 20161207 (2016).
3. J. Kingdon, D. Happold, T. Butynski, M. Hoffman, J. Kalina, Eds., *Mammals of Africa (Vol. I-VI)* (Bloomsbury Publishing, London, 2013).
4. C. K. Brain, *The Hunters or the Hunted? An Introduction to African Cave Taphonomy* (University of Chicago Press, Chicago, 1981).
5. R. N. Owen-Smith, *Megaherbivores: the influence of very large body size on ecology* (Cambridge University Press, Cambridge, 1988).
6. J. D. Skinner, C. T. Chimimba, *The Mammals of the Southern African Subregion* (Cambridge University Press, Cambridge, 2005).
7. R. D. Estes, *The Behavior Guide to African Mammals* (University of California Press, Los Angeles, 1991).
8. J. T. Faith, J. Rowan, A. Du, P. L. Koch (2018) Plio-Pleistocene decline of African megaherbivores: no evidence for ancient hominin impacts. *Science* **362**, 938-941 (2018).
9. T. E. Cerling *et al.*, Dietary changes of large herbivores in the Turkana Basin, Kenya from 4 to 1 Ma. *Proceedings of the National Academy of Sciences of the USA* **112**, 11467-11472 (2015).
10. T. E. Cerling, J. M. Harris, M. G. Leakey, Browsing and grazing in elephants: the isotope record of modern and fossil proboscideans. *Oecologia* **120**, 364-374 (1999).
11. A. K. Behrensmeyer, D. Western, D. E. Dechant Boaz, New perspectives in vertebrate paleoecology from a recent bone assemblage. *Paleobiology* **5**, 12-21 (1979).
12. D. Western, A. K. Behrensmeyer, Bone assemblages track animal community structure over 40 years in an African savanna ecosystem. *Science* **324**, 1061-1064 (2009).
13. R. L. Lyman, *Quantitative Paleozoology* (Cambridge University Press, Cambridge, 2008).
14. A. Tomašových, S. M. Kidwell, Predicting the effects of increasing temporal scale on species composition, diversity, and rank-abundance distributions. *Paleobiology* **36**, 672-695 (2010).
15. B. Van Valkenburgh, M. W. Hayward, W. J. Ripple, C. Meloro, V. L. Roth, The impact of large terrestrial carnivores on Pleistocene ecosystems. *Proceedings of the National Academy of Sciences of the USA* **113**, 862-867 (2016).
16. D. Geraads, Z. Alemseged, R. Bobe, D. Reed, *Enhydriodon dikikae*, sp. nov. (Carnivora: Mammalia), a gigantic otter from the Pliocene of Dikika, Lower Awash, Ethiopia. *Journal of Vertebrate Paleontology* **31**, 447-453 (2011).
17. M. E. Lewis, L. Werdelin, "Patterns of change in the Plio-Pleistocene carnivorans of eastern Africa" in *Hominin Environments in the East African Pliocene*, R. Bobe, Z. Alemseged, A. K. Behrensmeyer, Eds. (Springer, Dordrecht, 2007), pp. 77-105.

18. L. Werdelin, M. E. Lewis, Plio-Pleistocene Carnivora of eastern Africa: species richness and turnover patterns. *Zoological Journal of the Linnean Society* **144**, 121-144 (2005).
19. A. K. Behrensmeyer, D. D. Boaz, Late Pleistocene geology and paleontology of Amboseli National Park, Kenya. *Palaeoecology of Africa and the Surrounding Islands* **13**, 175-188 (1981).
20. W. J. Sanders, E. Gheerbrant, J. M. Harris, H. Saegusa, C. Delmer, "Proboscidea" in *Cenozoic Mammals of Africa*, L. Werdelin, W. J. Sanders, Eds. (University of California Press, Berkeley, 2010), pp. 161-251.
21. M. G. Leakey, J. M. Harris, *Lothagam: the dawn of humanity in eastern Africa* (Columbia University Press, New York, 2003).
22. D. Geraads, "Rhinocerotidae" in *Cenozoic Mammals of Africa*, L. Werdelin, W. J. Sanders, Eds. (University of California Press, Berkeley, 2010), pp. 669-683.
23. J. R. Boisserie *et al.*, A new species of *Nyanzachoerus* (Cetartiodactyla: Suidae) from the late Miocene Toros-Ménalla, Chad, Central Africa. *PLoS One* **9**, e103221 (2014).
24. G. WoldeGabriel *et al.*, The geological, isotopic, botanical, invertebrate, and lower vertebrate surrounding of *Ardipithecus ramidus*. *Science* **326**, 65e61-65e65 (2009).
25. T. D. White *et al.*, Macrovertebrate paleontology and the Pliocene habitat of *Ardipithecus ramidus*. *Science* **326**, 67-93 (2009).
26. R. L. Bernor, H. Gilbert, G. N. Semperebon, S. Simpson, S. Semaw, *Eurygnathohippus woldegabrieli*, sp. nov. (Perissodactyla, Mammalia), from the middle Pliocene of Aramis, Ethiopia. *Journal of Vertebrate Paleontology* **33**, 1472-1485 (2013).
27. G. WoldeGabriel *et al.*, Geology and palaeontology of the Late Miocene Middle Awash valley, Afar rift, Ethiopia. *Nature* **412**, 175-178 (2001).
28. F. Bibi, Mio-Pliocene faunal exchanges and African biogeography: the record of fossil bovids. *PLoS One* **6**, e16688 (2011).
29. Y. Haile-Selassie, G. WoldeGabriel, Eds., *Ardipithecus kadabba: late Miocene evidence from the Middle Awash, Ethiopia (Vol. 2)*. (University of California Press, Berkeley and Los Angeles, 2009).
30. D. Geraads, Z. Alemseged, D. Reed, J. Wynn, D. C. Roman, The Pleistocene fauna (other than Primates) from Asbole, lower Awash Valley, Ethiopia, and its environmental and biochronological implications. *Geobios* **37**, 697-718 (2004).
31. S. R. Frost, Z. Alemseged, Middle Pleistocene fossil Cercopithecidae from Asbole, Afar Region, Ethiopia. *Journal of Human Evolution* **53**, 227-259 (2007).
32. L. J. McHenry, A revised stratigraphic framework for Olduvai Gorge Bed I based on tuff geochemistry. *Journal of Human Evolution* **63**, 284-299 (2012).
33. R. L. Bernor, M. Armour-Chelu, W. H. Gilbert, T. M. Kaiser, E. Schulz, "Equidae" in *Cenozoic Mammals of Africa*, L. Werdelin, W. J. Sanders, Eds. (University of California Press, Berkeley, 2010).
34. A. W. Gentry, "Bovidae" in *Cenozoic Mammals of Africa*, L. Werdelin, W. J. Sanders, Eds. (University of California Press, Berkeley, 2010), pp. 741-796.
35. J. M. Harris, N. Solounias, D. Geraads, "Giraffoidea" in *Cenozoic Mammals of Africa*, L. Werdelin, W. J. Sanders, Eds. (University of California Press, Berkeley, 2010), pp. 797-811.

36. A. W. Gentry, A. Gentry, Fossil Bovidae of Olduvai Gorge, Tanzania. *Bulletin of the British Museum of Natural History, Geology Series* **29**, 289-446 (1978).
37. E. Weston, J. R. Boisserie, "Hippopotamidae" in *Cenozoic Mammals of Africa*, L. Werdelin, W. J. Sanders, Eds. (University of California Press, Berkeley, 2010), pp. 861-879.
38. NOW (2017) New and Old Worlds Database of Fossil Mammals. Licensed under CC BY 4.0. (<http://www.helsinki.fi/science/now>).
39. L. Werdelin, "Chronology of Neogene mammal localities" in *Cenozoic Mammals of Africa*, L. Werdelin, W. J. Sanders, Eds. (University of California Press, Berkeley, 2010), vol. 27-43.
40. L. C. Bishop, "Suoidea" in *Cenozoic Mammals of Africa*, L. Werdelin, W. J. Sanders, Eds. (University of California Press, Berkeley, 2010), pp. 821-842.
41. M. A. Everett, *The paleoecology of the Pleistocene Upper Busidima Formation, Gona, Afar Depression, Ethiopia* (Ph.D. Thesis, Indiana University, 2010).
42. J. T. Faith, C. A. Tryon, D. J. Peppe, D. L. Fox, The fossil history of Grévy's zebra (*Equus grevyi*) in equatorial East Africa. *Journal of Biogeography* **40**, 359-369 (2013).
43. I. McDougall *et al.*, New single crystal  $^{40}\text{Ar}/^{39}\text{Ar}$  ages improve time scale for deposition of the Omo Group, Omo-Turkana Basin, East Africa. *Journal of the Geological Society* **169**, 213-226 (2012).
44. M. Fortelius *et al.*, An ecometric analysis of the fossil mammal record of the Turkana Basin. *Philosophical Transactions of the Royal Society B: Biological Sciences* **371**, 20150232 (2016).
45. A. Du, Z. Alemseged, Diversity analysis of Plio-Pleistocene large mammal communities in the Omo-Turkana Basin, eastern Africa. *Journal of Human Evolution* **124**, 25-39 (2018).
46. N. G. Jablonski, S. F. Frost, "Cercopithecoidea" in *Cenozoic Mammals of Africa*, L. Werdelin, W. J. Sanders, Eds. (University of California Press, Berkeley, 2010), pp. 393-428.
47. A. Hill *et al.*, Neogene palaeontology and geochronology of the Baringo Basin, Kenya. *Journal of Human Evolution* **14**, 759-773 (1985).
48. W. H. Gilbert, B. Asfaw, *Homo erectus: Pleistocene evidence from the Middle Awash, Ethiopia* (University of California Press, Berkeley, 2009).
49. F. Bibi, *Evolution, systematics, and palaeoecology of Bovinae (Mammalia: Artiodactyla) from the Late Miocene to the recent* (Ph.D. Thesis, Yale University, 2009).
50. C. J. Campisano, C. S. Feibel, Connecting local environmental sequences to global climate patterns: evidence from the hominin-bearing Hadar Formation, Ethiopia. *Journal of Human Evolution*, **53**, 515-527 (2007).
51. K. E. Reed, Paleoeological patterns at the Hadar hominin site, Afar Regional State, Ethiopia. *Journal of Human Evolution* **54**, 743-768 (2008).
52. K. E. Reed, F. Bibi, Fossil Tragelaphini (Artiodactyla: Bovidae) from the Late Pliocene Hadar Formation, Afar Regional State, Ethiopia. *Journal of Mammalian Evolution* **18**, 57-69 (2011).

53. D. Geraads, Pliocene Rhinocerotidae (Mammalia) from Hadar and Dikika (Lower Awash, Ethiopia), and a revision of the origin of modern African rhinos. *Journal of Vertebrate Paleontology* **25**, 451-461 (2005).
54. D. Geraads, R. Bobe, K. E. Reed, Pliocene Bovidae (Mammalia) from the Hadar Formation of Hadar and Ledi-Geraru, Lower Awash, Ethiopia. *Journal of Vertebrate Paleontology* **32**, 180-197 (2012).
55. D. Geraads, K. Reed, R. Bobe, Pliocene Giraffidae (Mammalia) from the Hadar Formation of Hadar and Ledi-Geraru, Lower Awash, Ethiopia. *Journal of Vertebrate Paleontology* **33**, 470-481 (2013).
56. D. Geraads, V. Eisenmann, G. Petter, "The large mammal fauna of the Oldowan sites of Melka Kunture" in Studies on the Early Paleolithic Site of Melka Kunture, Ethiopia, J. Chavaillon, M. Piperno, Eds. (Istituto Italiano di Preistoria e Protostoria, Florence, 2004), pp. 169-192.
57. L. MacLatchy, J. DeSilva, W. J. Sanders, B. Wood, "Hominini" in Cenozoic Mammals of Africa, L. Werdelin, W. J. Sanders, Eds. (University of California Press, Berkeley, 2010), pp. 471-540.
58. E. N. DiMaggio *et al.*, Late Pliocene fossiliferous sedimentary record and the environmental context of early *Homo* from Afar, Ethiopia. *Science* **347**, 1355-1359 (2015).
59. J. Rowan *et al.*, Fossil Giraffidae (Mammalia, Artiodactyla) from Lee Adoyta, Ledi-Geraru, and Late Pliocene dietary evolution in giraffids from the Lower Awash Valley, Ethiopia. *Journal of Mammalian Evolution* **24**, 359-371 (2017).
60. F. Bibi, J. Rowan, K. Reed, Late Pliocene Bovidae from Ledi-Geraru (Lower Awash Valley, Ethiopia) and their implications for Afar paleoecology. *Journal of Vertebrate Paleontology* **37**, e1337639 (2017).
61. I. A. Lazagabaster *et al.*, Fossil Suidae (Mammalia, Artiodactyla) from Lee Adoyta, Ledi-Geraru, Lower Awash Valley, Ethiopia: implications for late Pliocene turnover and paleoecology. *Palaeogeography, Palaeoclimatology, Palaeoecology* **504**, 186-299 (2018).
62. J. R. Robinson, Thinking locally: environmental reconstruction of Middle and Later Stone Age archaeological sites in Ethiopia, Kenya, and Zambia based on ungulate stable isotopes. *Journal of Human Evolution* **106**, 19-37 (2017).
63. C. A. Tryon *et al.*, Late Pleistocene age and archaeological context for the hominin calvaria from GvJm-22 (Lukenya Hill, Kenya). *Proceedings of the National Academy of Sciences of the USA* **112**, 2682-2687 (2015).
64. J. de Heinzelin *et al.*, Environment and behavior of 2.5-million-year-old Bouri hominids. *Science* **284**, 625-629 (1999).
65. J. R. Boisserie, T. D. White, A new species of Pliocene Hippopotamidae from the Middle Awash, Ethiopia. *Journal of Vertebrate Paleontology* **24**, 464-473 (2004).
66. T. D. White, G. Suwa, A new species of *Notochoerus* (Artiodactyla, Suidae) from the Pliocene of Ethiopia. *Journal of Vertebrate Paleontology* **24** (2004).
67. T. Harrison, E. Baker, "Paleontology and biochronology of fossil localities in the Manonga Valley, Tanzania" in Neogene Paleontology of the Manonga Valley, Tanzania: A Window into the Evolutionary History of East Africa, T. Harrison, Ed. (Plenum, New York, 1997), pp. 361-396.

68. C. S. Feibel, Stratigraphy and depositional setting of the Pliocene Kanapoi Formation, lower Kerio valley, Kenya. *Natural History Museum of Los Angeles County, Contributions in Science* **498**, 9-20 (2003).
69. J. M. Harris, M. G. Leakey, T. E. Cerling, A. J. Winkler, Early Pliocene tetrapod remains from Kanapoi, Lake Turkana Basin, Kenya. *Natural History Museum of Los Angeles County, Contributions in Science* **498**, 39-114 (2003).
70. D. Geraads, R. Bobe, F. K. Manthi, New ruminants (Mammalia) from the Pliocene of Kanapoi, Kenya, and a revision of previous collections, with a note on the Suidae. *Journal of African Earth Sciences* **85**, 53-61 (2013).
71. E. Mbuja *et al.*, Kantis: a new *Australopithecus* site on the shoulders of the Rift Valley near Nairobi, Kenya. *Journal of Human Evolution* **94**, 28-44 (2016).
72. N. Blegen *et al.*, Distal tephras of the eastern Lake Victoria Basin, Equatorial East Africa: correlations, chronology, and a context for early modern humans. *Quaternary Science Reviews* **122**, 89-111 (2015).
73. N. Blegen, J. T. Faith, A. Mant-Melville, D. J. Peppe, C. A. Tryon, The Middle Stone Age after 50,000 years ago: new evidence from the Late Pleistocene sediments of the eastern Lake Victoria Basin, western Kenya. **2017**, 139-169 (2017).
74. J. T. Faith *et al.*, Paleoenvironmental context of the Middle Stone Age record from Karungu, Lake Victoria Basin, Kenya, and its implications for human and faunal dispersals in East Africa. *Journal of Human Evolution* **83**, 28-45 (2015).
75. F. H. Brown, I. McDougall, J. G. Fleagle, Correlation of the KHS Tuff of the Kibish Formation to volcanic ash layers at other sites, and the age of early *Homo sapiens* (Omo I and Omo II). *Journal of Human Evolution* **63**, 577-585 (2012).
76. J. Rowan, J. T. Faith, Y. Gebru, J. G. Fleagle, Taxonomy and paleoecology of fossil Bovidae (Mammalia, Artiodactyla) from the Kibish Formation, southern Ethiopia: implications for dietary change, biogeography, and the structure of living bovid faunas of East Africa. *Palaeogeography, Palaeoclimatology, Palaeoecology* **420**, 210-222 (2015).
77. Z. Assefa, S. Yirga, K. E. Reed, The large-mammal fauna from the Kibish Formation. *Journal of Human Evolution* **55**, 501-512 (2008).
78. G. Suwa *et al.*, Plio-Pleistocene terrestrial mammal assemblage from Konso, Southern Ethiopia. *Journal of Vertebrate Paleontology* **23**, 901-916 (2003).
79. R. Potts, A. Deino, Mid-Pleistocene change in large mammal faunas of East Africa. *Quaternary Research* **43**, 106-113 (1995).
80. S. H. Ambrose *et al.*, The paleoecology and paleogeographic context of Lemudong'o Locality 1, a late Miocene terrestrial fossil site in southern Kenya. *Kirtlandia* **56**, 38-52 (2007).
81. A. Deino, "40Ar/39Ar dating of Laetoli, Tanzania" in *Paleontology and Geology of Laetoli: Human Evolution in Context*, T. M. Harrison, Ed. (Springer, 2011), pp. 77-97.
82. T. Harrison, Ed., *Paleontology and Geology of Laetoli: Human Evolution in Context* (Springer, Dordrecht, 2011).
83. K. Kovarovic, R. Slepko, K. P. McNulty, Ecological continuity between lower and upper Bed II, Olduvai Gorge, Tanzania. *Journal of Human Evolution* **64**, 538-555 (2013).
84. M. Coombs, S. Cote, "Chalicotheriidae" in *Cenozoic Mammals of Africa*, L. Werdelin, W. J. Sanders, Eds. (University of California Press, Berkeley, 2010), pp. 659-667.

85. W. H. Kimbel *et al.*, Late Pliocene *Homo* and Oldowan tools from the Hadar Formation (Kada Hadar Member), Ethiopia. *Journal of Human Evolution* **31**, 549-561 (1996).
86. C. A. Tryon *et al.*, The Pleistocene prehistory of the Lake Victoria Basin. *Quaternary International* **404, Part B**, 100-114 (2016).
87. M. S. Drapeau *et al.*, The Omo Mursi Formation: a window into the East African Pliocene. *Journal of Human Evolution* **75**, 64-79 (2014).
88. R. Potts *et al.*, Environmental dynamics during the onset of the Middle Stone Age in eastern Africa. *Science* **360**, 86-90 (2018).
89. A. Deino, R. Potts, Single-crystal <sup>40</sup>Ar/<sup>39</sup>Ar dating of the Olorgesailie formation, southern Kenya rift. *Journal of Geophysical Research* **95**, 8453-8470 (1990).
90. C. V. Ward *et al.*, South Turkwel: a new Pliocene hominid site in Kenya. *Journal of Human Evolution* **36**, 69-95 (1999).
91. H. J. O'Regan, S. C. Reynolds, An ecological reassessment of the southern African carnivore guild: a case study from Member 4, Sterkfontein, South Africa. *Journal of Human Evolution* **57**, 212-222 (2009).
92. M. E. Lewis, Carnivoran paleoguilds of Africa: implications for hominin food procurement strategies. *Journal of Human Evolution* **32**, 257-288 (1997).
93. G. Petter, F. C. Howell, Nouveau félidé machairodonte (Mammalia, Carnivora) de la faune pliocène de l'Afar (Ethiopie): *Homotherium hadarensis* n. sp. *Comptes Rendus de l'Académie des Sciences II* **306**, 731-738 (1988).
94. L. Werdelin, M. E. Lewis, *Koobi Fora Research Project: Volume 7: The Carnivora* (California Academy of Sciences, San Francisco, CA, 2013).
95. L. Werdelin, S. Peigné, "Carnivora" in *Cenozoic Mammals of Africa*, L. Werdelin, W. J. Sanders, Eds. (University of California Press, Berkeley, 2010), pp. 603-657.
96. O. Oksanen, Feeding ecology of Lothagam and Koobi Fora fossil carnivorans. *Master's Thesis. Department of Geosciences and Geography. University of Helsinki* (2017).
97. S. Le Fur, E. Fara, H. T. Mackaye, P. Vignaud, M. Brunet, The mammal assemblage of the hominid site TM266 (Late Miocene, Chad Basin): ecological structure and paleoenvironmental implications. *Naturwissenschaften* **96**, 565-574 (2009).
98. T. Harrison, "Paleoecology and taphonomy of fossil localities in the Manonga Valley, Tanzania" in *Neogene Paleontology of the Manonga Valley, Tanzania*. (Springer, Boston, 1997), pp. 79-105.
99. Y. Haile-Selassie, F. C. Howell, "Carnivora" in *Ardipithecus kadabba: Late Miocene Evidence from the Middle Awash, Ethiopia*, Y. Haile-Selassie, G. WoldeGabriel, Eds. (University of California Press, Berkeley, 2009), pp. 237-276.
100. J. Morales, M. Pickford, D. Soria, Carnivores from the late Miocene and basal Pliocene of the Tugen Hills, Kenya. *Revista de la Sociedad Geológica de España*, **18**, 39-61 (2005).
101. L. Werdelin, M. E. Lewis, A revision of the genus *Dinofelis* (Mammalia, Felidae). *Zoological Journal of the Linnean Society* **132**, 147-258 (2001).
102. P. Palmqvist *et al.*, The giant hyena *Pachycrocuta brevirostris*: modelling the bone-cracking behavior of an extinct carnivore. *Quaternary International* **243**, 61-79 (2011).

103. R. Sardella, L. Werdelin, *Amphimachairodus* (Felidae, Mammalia) from Sahabi (latest Miocene-earliest Pliocene, Libya), with a review of African Machairodontinae. *Rivista Italiana di Paleontologia e Stratigrafia* **113**, 67-77 (2007).
